# Supplementary material for: Rapid determination of β2-agonists in urine samples by microchip micellar electrokinetic chromatography with pulsed electrochemical detection
Source: Royal Society of Chemistry journal article supplement (doi:10.1039/c3ay00061c), 2013-01-01
Supplement: c3ay00061c.pdf [file c3ay00061c.pdf]

## Rapid determination of $\beta_2$ -agonists in urine samples by microchip micellar electrokinetic chromatography with pulsed electrochemical detection

Authors: Yongsheng Ding<sup>\*a</sup>, Yunlong Qi<sup>a</sup>, Xingmei Suo<sup>b</sup>

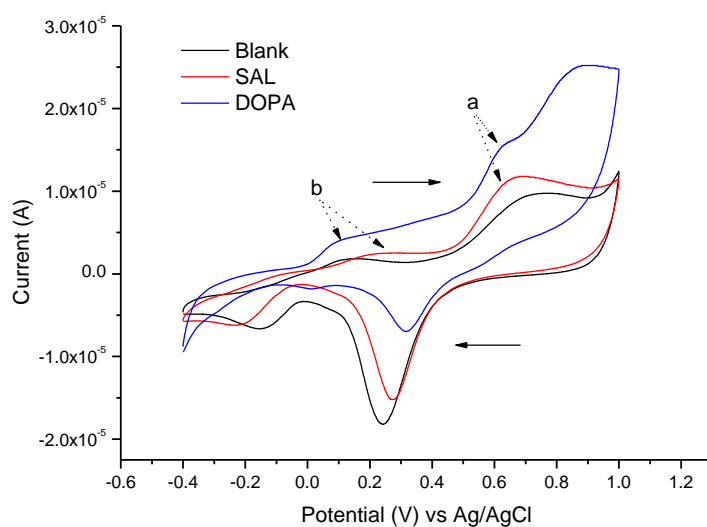

Fig. S1. Cyclic voltammograms (2<sup>nd</sup> cycle) at an Au electrode obtained in 10 mM borate (pH=10) with 20 mM SDS background electrolyte: Blank (black curve); 50  $\mu$ M SAL (red curve); 50  $\mu$ M dopamine (blue curve). Sweep rate 100 mV/s.
